# Supplementary material for: Mechanistic aspects of photo-induced formation of peroxide ions on the surface of cubic Ln2O3 (Ln = Nd, Sm, Gd) under oxygen
Source: Royal Society of Chemistry journal article supplement (doi:10.1039/c2cp40086c), 2012-01-01
Supplement: c2cp40086c.pdf [file c2cp40086c.pdf]

## Mechanistic aspects of photo-induced formation of peroxide ions on the surface of cubic $\text{Ln}_2\text{O}_3$ ( $\text{Ln} = \text{Nd}, \text{Sm}, \text{Gd}$ ) under oxygen

Xiao-Lian Jing, Qing-Chuan Chen, Chong He, Xue-Quan Zhu, Wei-Zheng Weng\*, Wen-Sheng Xia, Hui-Lin Wan\*

Electronic supplementary information (ESI)

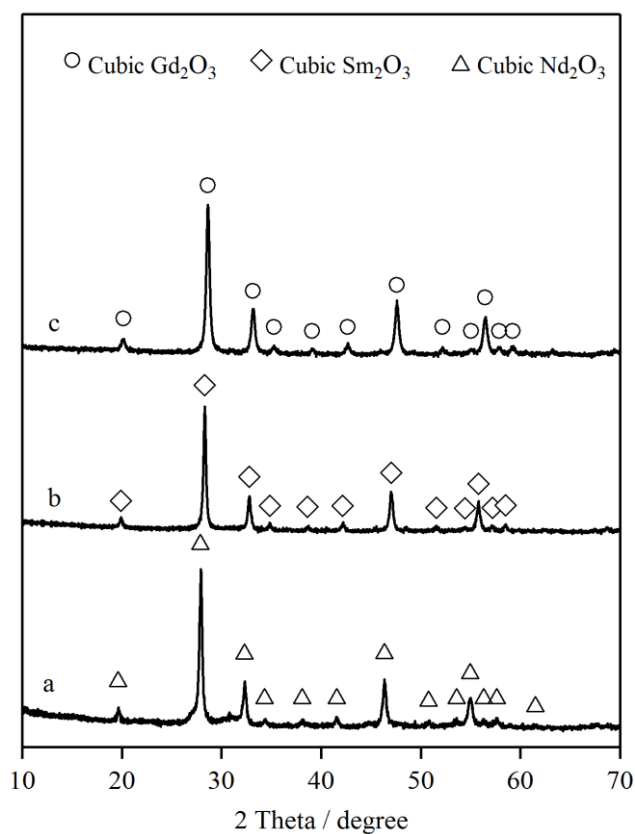

Fig. S1. XRD patterns of the prepared  $\text{Ln}_2\text{O}_3$  samples: a)  $\text{Nd}_2\text{O}_3$ , b)  $\text{Sm}_2\text{O}_3$  and c)  $\text{Gd}_2\text{O}_3$ .

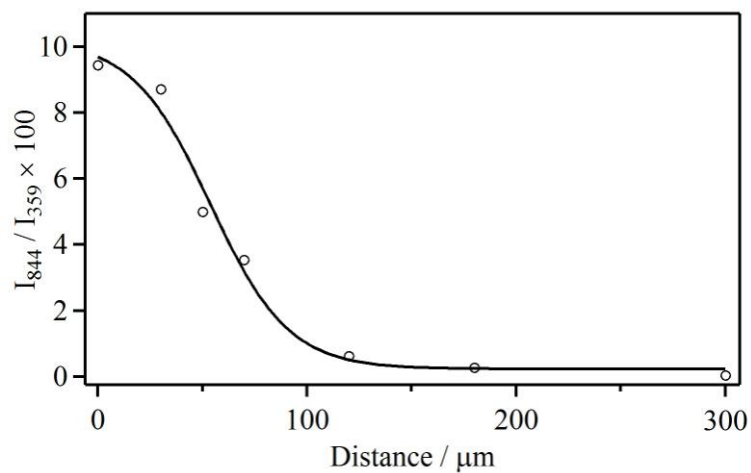

Fig. S2. Plot of intensity ratio of the Raman peaks at  $844\text{ cm}^{-1}$  ( $\nu_{(O-O)^{2-}}$ ) and  $359\text{ cm}^{-1}$  ( $\nu_{(Gd^{3+}-O^{2-})}$ ) on a cubic  $\text{Gd}_2\text{O}_3$  against the distance from the center of the laser beam after the sample under  $\text{O}_2$  was continuously irradiated with a focused  $325\text{ nm}$  laser beam ( $\sim 3\text{ }\mu\text{m}$  in diameter) at  $150\text{ }^\circ\text{C}$  for  $90\text{ min}$ .

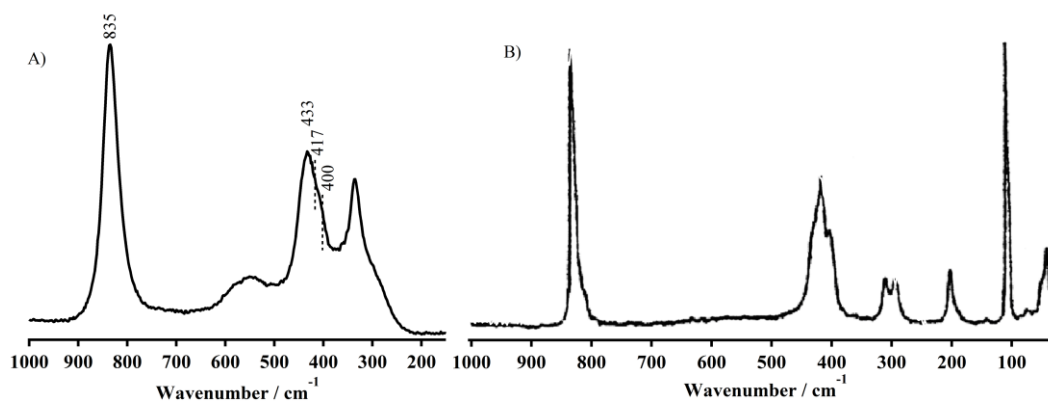

Fig. S3. A) the Raman spectrum of the Nd peroxide linkage formed by irradiating cubic Nd<sub>2</sub>O<sub>3</sub> under flowing O<sub>2</sub> with 325 nm laser at room temperature, B) The Raman spectrum of Nd<sub>2</sub>O<sub>2</sub>(O<sub>2</sub>) (neodymium (III) oxide peroxide) reported by A. M. Heyns and K. J. Range (*J. Raman. Spectrosc.*, 1994, **25**, 855).

### Calculation of the band positions for the $^{18}\text{O}_2^{2-}$ and $(^{18}\text{O}^{16}\text{O})^{2-}$ peroxide ions

For a diatomic molecule A-B, the fundamental vibration frequency ( $\nu$ ) of a chemical bond between atom A and B could be approximated by a harmonic oscillator:

$$\nu = \frac{1}{2\pi} \sqrt{\frac{k}{\mu}}$$

where

$k$  is the spring constant for the bond; and

$\mu$  ( $\mu = \frac{M_A \times M_B}{M_A + M_B}$ ,  $M$  is the mass of the atom) is the reduced mass for diatomic molecule A-B.

The fundamental vibration frequency ( $\nu$ ) for the  $^{16}\text{O}_2^{2-}$ ,  $^{18}\text{O}_2^{2-}$  and  $(^{18}\text{O}^{16}\text{O})^{2-}$  peroxide ions are given by the following equations

$$\nu_{^{16}\text{O}_2^{2-}} = \frac{1}{2\pi} \sqrt{\frac{k}{\mu_{^{16}\text{O}_2}}}$$

$$\nu_{^{18}\text{O}_2^{2-}} = \frac{1}{2\pi} \sqrt{\frac{k}{\mu_{^{18}\text{O}_2}}}$$

$$\nu_{(^{18}\text{O}^{16}\text{O})^{2-}} = \frac{1}{2\pi} \sqrt{\frac{k}{\mu_{^{18}\text{O}^{16}\text{O}}}}$$

Based on the band position for the fundamental vibration frequency of the  $^{16}\text{O}_2^{2-}$  peroxide ion ( $\nu_{^{16}\text{O}_2^{2-}}$ ) at  $833 \text{ cm}^{-1}$ , band positions for the  $^{18}\text{O}_2^{2-}$  and  $(^{18}\text{O}^{16}\text{O})^{2-}$  peroxide ions can be calculated using the following equations

$$\nu_{^{18}\text{O}_2^{2-}} = \nu_{^{16}\text{O}_2^{2-}} \sqrt{\frac{\mu_{^{16}\text{O}_2}}{\mu_{^{18}\text{O}_2}}} = 0.943 \nu_{^{16}\text{O}_2^{2-}} = 0.943 \times 833 = 786 \text{ cm}^{-1}$$

$$\nu_{(^{18}\text{O}^{16}\text{O})^{2-}} = \nu_{^{16}\text{O}_2^{2-}} \sqrt{\frac{\mu_{^{16}\text{O}_2}}{\mu_{^{18}\text{O}^{16}\text{O}}}} = 0.972 \nu_{^{16}\text{O}_2^{2-}} = 0.972 \times 833 = 810 \text{ cm}^{-1}$$
